# Supplementary material for: Wearable accelerometers reveal objective assessment of walking symmetry and regularity in idiopathic scoliosis patients
Source: PeerJ. 2024 Jul 16;12:e17739. doi: 10.7717/peerj.17739 (PMC11259127; doi:10.7717/peerj.17739)
Supplement: Supplemental Information 1 [file peerj-12-17739-s001.xlsx]

## Sheet: Sheet1
num	group	RMS-X	RMS-Y	RMS-Z	HR-X	HR-Y	HR-Z	STEP-X	STEP-Y	STEP-Z	STRIP-X	STRIP-Y	STRIP-Z	GAIT-X	GAIT-Y	GAIT-Z	Cadence	SPEED
1	scoliosis	0.55	0.745	1.975	0.91	2.145	2.44	-0.14	-0.63	0.815	0.575	0.71	0.78	-0.26	-0.862	1.048	124.14	1.18
2	scoliosis	0.38	0.66	2.265	1.24	2.755	3.495	0.08	-0.705	0.905	0.62	0.75	0.92	0.128	-0.942	0.985	116.25	1.23
3	scoliosis	0.35	0.82	1.675	1.075	3.505	2.72	0.2	-0.715	0.835	0.725	0.845	0.82	0.282	-0.851	1.018	114.31	1.22
4	scoliosis	0.18	0.61	1.7	0.97	3.175	3.17	0.02	-0.865	0.905	0.49	0.84	0.975	0.042	-1.03	0.928	122.07	1.31
5	scoliosis	0.445	0.805	1.935	1.81	3.905	3.9	0.595	-0.88	0.935	0.775	0.83	0.92	0.767	-1.059	1.016	118.06	1.23
6	scoliosis	0.395	0.92	1.44	0.51	3.73	2.38	0.68	-0.905	0.735	0.735	0.88	0.895	0.93	-1.029	0.821	118.06	1.22
7	scoliosis	0.495	0.875	2.775	1.14	3.68	4.335	0.27	-0.885	0.935	0.775	0.89	0.96	0.351	-0.994	0.974	118.06	1.28
8	scoliosis	0.69	0.79	1.98	2.505	2.995	3.505	0.825	-0.745	0.905	0.925	0.905	0.915	0.893	-0.823	0.989	118.06	1.26
9	scoliosis	0.625	0.735	1.6	1.235	2.485	2.19	0.465	-0.67	0.77	0.48	0.695	0.87	0.983	-0.966	0.885	104.37	1.25
10	scoliosis	0.305	0.395	1.48	1.675	1.98	2.96	0.68	-0.46	0.88	0.75	0.74	0.89	0.902	-0.613	0.99	101.43	1.44
11	scoliosis	1.045	1.455	2.285	1.25	1.8	2.36	0.36	-0.5	0.8	0.68	0.77	0.8	0.534	-0.653	0.999	112.5	1.39
12	scoliosis	0.32	0.79	2.055	0.93	3.565	3.015	0.11	-0.87	0.89	0.525	0.835	0.83	0.246	-1.04	1.075	120	1.31
13	scoliosis	0.45	0.715	2.31	1.79	3.275	4.625	0.485	-0.865	0.93	0.74	0.95	0.93	0.637	-0.911	1	114.31	1.4
14	scoliosis	0.535	0.95	1.835	1.29	4.075	3.29	0.515	-0.915	0.875	0.605	0.895	0.88	0.86	-1.023	0.996	104.37	1.28
15	scoliosis	0.625	0.445	2.6	1.87	2.07	4.035	0.66	-0.555	0.915	0.59	0.76	0.915	1.156	-0.731	1	120	1.28
16	scoliosis	0.72	0.805	2.625	2.135	2.885	3.995	0.655	-0.705	0.945	0.69	0.78	0.945	0.948	-0.903	1	116.13	1.28
17	scoliosis	0.175	0.44	1.79	1.26	2.605	4.875	0.175	-0.635	0.935	0.445	0.82	0.935	0.388	-0.772	1	116.13	1.2
1	Healthy	0.85	1.01	3.015	2.1	3.395	3.82	0.66	-0.84	0.955	0.755	0.845	0.935	0.865	-0.993	1.022	114.31	1.22
2	Healthy	0.555	1.015	2.19	1.765	4.32	4.58	0.615	-0.89	0.95	0.88	0.865	0.94	0.698	-1.029	1.011	112.61	1.21
3	Healthy	0.89	1.005	2.33	2.4	2.77	3.63	0.685	-0.655	0.88	0.78	0.865	0.905	0.887	-0.757	0.972	120	1.2
4	Healthy	0.795	0.89	2.465	1.63	2.415	4.41	0.66	-0.48	0.915	0.855	0.915	0.915	0.772	-0.519	1	124.14	1.44
5	Healthy	0.755	0.74	2.215	0.85	2.245	2.995	0.505	-0.49	0.865	0.745	0.8	0.88	0.682	-0.633	0.984	120.13	1.28
6	Healthy	0.38	0.65	2.25	1.77	3.485	4.235	0.57	-0.845	0.93	0.545	0.84	0.905	1.072	-1.004	1.028	109.19	1.24
7	Healthy	0.59	1.01	2.195	1.785	3.81	4.87	0.68	-0.85	0.945	0.92	0.935	0.965	0.739	-0.909	0.979	116.13	1.22
8	Healthy	0.34	0.555	2.37	1.595	2.61	4.625	0.52	-0.79	0.965	0.685	0.76	0.975	0.76	-1.039	0.99	124.14	1.37
9	Healthy	0.475	0.91	2.92	1.59	3.475	3.52	0.54	-0.825	0.905	0.77	0.85	0.925	0.708	-0.97	0.98	128.57	1.27
10	Healthy	0.57	0.54	2.74	0.82	2.075	4.775	0.565	-0.806	0.98	0.855	0.815	0.99	0.662	-0.989	0.99	112.5	1.25
11	Healthy	1.185	1.165	3.385	0.945	2.38	6.285	0.475	-0.585	0.97	0.95	0.935	0.99	0.501	-0.626	0.98	120	1.34
12	Healthy	0.61	0.54	1.955	1.03	2.5	5.02	0.57	-0.655	0.94	0.72	0.865	0.935	0.79	-0.756	1.005	116.13	1.37
13	Healthy	0.49	0.85	2.37	0.91	3.515	4.34	0.45	-0.83	0.955	0.695	0.92	0.945	0.647	-0.903	1.011	128.57	1.25
14	Healthy	0.905	1.125	3.4	2.2	3.435	5.085	0.545	-0.82	0.96	0.855	0.925	0.975	0.637	-0.886	0.985	116.13	1.27
15	Healthy	0.48	0.67	1.645	1.005	3.22	2.745	0.365	-0.78	0.835	0.705	0.865	0.88	0.511	-0.905	0.95	116.13	1.33
16	Healthy	0.525	0.905	2.135	2.12	3.54	4.35	0.74	-0.805	0.945	0.79	0.885	0.925	0.939	-0.913	1.022	112.5	1.25
17	Healthy	0.57	0.67	2	2.52	4.26	4.745	0.785	-0.845	0.955	0.92	0.885	0.965	0.851	-0.955	0.99	114.31	1.44
