# Supplementary material for: Wearable accelerometers reveal objective assessment of walking symmetry and regularity in idiopathic scoliosis patients
Source: PeerJ. 2024 Jul 16;12:e17739. doi: 10.7717/peerj.17739 (PMC11259127; doi:10.7717/peerj.17739)
Supplement: Supplemental Information 2 [file peerj-12-17739-s002.xlsx]

## Sheet: Sheet1
num	group	RMS-X	RMS-Y	RMS-Z	HR-X	HR-Y	HR-Z	STEP-X	STEP-Y	STEP-Z	STRIP-X	STRIP-Y	STRIP-Z	GAIT-X	GAIT-Y	GAIT-Z	Cadence
1	scoliosis	2.03	1.425	2.04	5.325	2.48	3.5	0.95	-0.67	0.875	0.945	0.81	0.905	1.006	-0.827	0.969	126.355
2	scoliosis	2.39	1.745	2.02	3.405	1.92	3.47	0.875	-0.445	0.865	0.91	0.77	0.875	0.962	-0.587	0.99	116.25
3	scoliosis	1.49	1.405	1.34	2.5	1.915	2.32	0.76	-0.52	0.785	0.855	0.735	0.75	0.889	-0.708	1.045	114.315
4	scoliosis	1.65	0.91	1.45	3.995	3.19	3.825	0.895	-0.795	0.915	0.96	0.875	0.98	0.933	-0.913	0.934	122.069
5	scoliosis	2.035	1.275	2.005	4.21	2.215	3.81	0.9	-0.58	0.88	0.89	0.645	0.865	1.011	-0.906	1.017	118.065
6	scoliosis	1.505	1.335	1.36	3.9	2.34	2.725	0.91	-0.645	0.815	0.895	0.72	0.815	1.017	-0.903	1.002	118.065
7	scoliosis	1.93	0.945	2.45	5.15	1.84	4.815	0.945	-0.415	0.945	0.95	0.77	0.965	0.995	-0.537	0.979	118.065
8	scoliosis	1.315	1.46	1.77	2.43	1.61	3.59	0.77	-0.305	0.87	0.87	0.715	0.855	0.885	-0.419	1.018	118.065
9	scoliosis	2.18	1.69	1.86	3.605	2.06	2.4	0.88	-0.48	0.76	0.855	0.525	0.815	1.029	-0.923	0.933	105.882
10	scoliosis	1.67	0.795	1.5	4.32	1.92	3.99	0.945	-0.615	0.9	0.945	0.77	0.855	1	-0.793	1.054	101.429
11	scoliosis	2.21	1.9	2	2.785	1.85	2.39	0.77	-0.415	0.76	0.765	0.5	0.765	1.006	-0.829	0.992	112.5
12	scoliosis	1.755	1.995	2.045	2.4	2.34	2.73	0.75	-0.58	0.81	0.795	0.59	0.815	0.94	-0.983	0.998	122.069
13	scoliosis	1.585	1.39	2.665	3.24	1.28	4.57	0.895	-0.155	0.925	0.925	0.65	0.915	0.968	-0.24	1.011	114.315
14	scoliosis	1.65	1.155	1.805	4.345	2.095	3.51	0.93	-0.545	0.92	0.93	0.69	0.9	1	-0.791	1.022	104.37
15	scoliosis	1.895	0.96	2.67	4.295	1.775	3.785	0.875	-0.44	0.905	0.815	0.485	0.89	1.08	-0.936	1.022	120
16	scoliosis	1.925	1.135	2.335	3.615	1.44	3.655	0.865	-0.34	0.94	0.88	0.815	0.955	0.983	-0.417	0.984	116.129
17	scoliosis	1.825	1.345	1.957	3.72	2.017	3.482	0.87	-0.497	0.867	0.887	0.692	0.87	0.982	-0.732	0.998	115.496
1	Healthy	2.055	1.875	2.84	4.085	3.09	3.99	0.935	-0.81	0.97	0.88	0.735	0.96	1.063	-1.102	1.01	114.315
2	Healthy	1.845	1.095	2.26	4.455	2.26	5.25	0.93	-0.65	0.935	0.935	0.79	0.925	0.995	-0.823	1.011	112.61
3	Healthy	1.82	2.325	2.25	1.805	2.37	3.58	0.495	-0.65	0.815	0.78	0.765	0.855	0.639	-0.849	0.951	120
4	Healthy	2.11	1.85	2.54	4.27	3.435	3.76	0.94	-0.815	0.92	0.94	0.885	0.945	1	-0.921	0.974	124.138
5	Healthy	1.9	1.05	2.15	4.29	1.91	3.345	0.905	-0.39	0.83	0.855	0.575	0.82	1.064	-0.669	1.018	120.133
6	Healthy	2.17	1.89	2.365	2.785	2.21	2.72	0.71	-0.56	0.69	0.67	0.515	0.725	1.091	-1.347	0.931	109.191
7	Healthy	1.72	1.145	2.18	3.3	1.165	3.305	0.77	-0.16	0.82	0.715	0.57	0.835	1.137	-0.31	0.983	116.129
8	Healthy	2.205	1.69	2.7	2.85	2.54	4.7	0.88	-0.705	0.97	0.965	0.86	0.975	0.912	-0.82	0.995	124.138
9	Healthy	2	2.125	2.725	2.37	2.275	3.67	0.72	-0.655	0.93	0.855	0.69	0.915	0.846	-0.979	1.019	128.571
10	Healthy	2.285	1.175	2.65	3.925	0.85	4.105	0.88	-0.41	0.925	0.87	0.755	0.9	1.022	-0.551	1.034	112.5
11	Healthy	2.1	1.47	3.425	5.415	2.1	4.5	0.945	-0.645	0.935	0.945	0.865	0.965	1	-0.747	0.969	120
12	Healthy	1.555	0.955	1.74	3.95	2.44	4.645	0.915	-0.605	0.94	0.96	0.76	0.94	0.953	-0.793	1	116.129
13	Healthy	1.68	1.57	2.355	1.71	2.045	4.41	0.635	-0.57	0.94	0.89	0.83	0.915	0.713	-0.688	1.027	128.571
14	Healthy	2.32	1.5	3.255	2.89	2.255	4.955	0.8	-0.49	0.905	0.82	0.665	0.885	0.983	-0.799	1.025	116.129
15	Healthy	1.665	1.135	1.74	3.705	2.29	3.155	0.925	-0.62	0.89	0.96	0.735	0.865	0.964	-0.841	1.031	116.129
16	Healthy	1.98	1.77	1.945	4.125	3.11	3.235	0.905	-0.775	0.87	0.88	0.69	0.895	1.028	-1.126	0.972	112.5
17	Healthy	1.89	1.05	2.15	3.93	1.345	4.195	0.93	-0.17	0.94	0.955	0.815	0.955	0.974	-0.208	0.984	114.315
